# Supplementary material
Source: HighWire-hosted journal article supplement (https://bmjopen.bmj.com/content/11/9/e047246)
Supplement: inline-supplementary-material-1 [file inline-supplementary-material-1.pdf]

## **A Review of Referrals Reveal the Impact of Referral Content on the Triage and Management of Ophthalmology Wait Lists**

Vincent Khou<sup>1,2</sup>, Angelica Ly<sup>1,2</sup>, Lindsay Moore<sup>1,2</sup>, Maria Markoulli<sup>2</sup>, Michael Kalloniatis<sup>1,2</sup>, Michael Yapp<sup>1,2</sup>, Michael Hennessy<sup>1,3</sup>, Barbara Zangerl<sup>2</sup>

1. Centre for Eye Health, University of New South Wales, Sydney, New South Wales, Australia

2. School of Optometry and Vision Science, Faculty of Medicine and Health, University of New South Wales, Sydney, New South Wales, Australia

3. Department of Ophthalmology, Prince of Wales Hospital, Sydney, New South Wales, Australia

### **Supplementary Materials**

Supplementary Tables: 3

Supplementary Table 1. Information content of referrals by profession.

|                                         |                         | Reason for Referral |            |                     |               |                    | Presence of Visual Acuity |                      |                    | Presence of a Sign or Symptom |                    |                          |                    |
|-----------------------------------------|-------------------------|---------------------|------------|---------------------|---------------|--------------------|---------------------------|----------------------|--------------------|-------------------------------|--------------------|--------------------------|--------------------|
|                                         |                         | Anterior Eye        | Cataract   | General Examination | Posterior Eye | Post hoc Analysis† | Visual Acuity Present     | Visual Acuity Absent | Post hoc Analysis† | Signs or Symptoms Present     | Diagnosis Reported | Signs or Symptoms Absent | Post hoc Analysis† |
| Set A:<br>Existing Wait List, n (%)     | a. General practitioner | 52 (27.4)           | 62 (32.6)  | 32 (16.8)           | 44 (23.2)     | a. vs b. P < 0.001 | 11 (5.8)                  | 179 (94.2)           | a. vs b. P < 0.001 | 81 (42.6)                     | 77 (40.5)          | 32 (16.8)                | a. vs b. P < 0.001 |
|                                         | b. Optometrist          | 15 (8.2)            | 124 (67.4) | 3 (1.6)             | 42 (22.8)     | b vs c. P < 0.001  | 168 (91.3)                | 16 (8.7)             |                    | 167 (90.8)                    | 15 (8.2)           | 2 (1.1)                  |                    |
|                                         | c. Other                | 8 (18.2)            | 15 (34.1)  | 4 (9.1)             | 17 (38.6)     |                    | 12 (27.3)                 | 32 (72.7)            |                    | 23 (52.3)                     | 17 (38.6)          | 4 (9.1)                  |                    |
| Set B:<br>New Incoming Referrals, n (%) | d. General practitioner | 53 (24.8)           | 79 (36.9)  | 34 (15.9)           | 48 (22.4)     | d. vs e. P < 0.001 | 21 (9.8)                  | 193 (90.2)           | d. vs e. P < 0.001 | 101 (47.2)                    | 83 (38.8)          | 30 (14.0)                | d. vs e. P < 0.001 |
|                                         | e. Optometrist          | 25 (11.0)           | 149 (65.6) | 3 (1.3)             | 50 (22.0)     | e. vs f. P < 0.001 | 212 (93.4)                | 15 (6.6)             |                    | 204 (89.9)                    | 22 (9.7)           | 1 (0.4)                  |                    |
|                                         | f. Other                | 15 (17.2)           | 25 (28.7)  | 18 (20.7)           | 29 (33.3)     |                    | 32 (36.8)                 | 55 (63.2)            |                    | 4 (57.1)                      | 1 (14.3)           | 2 (28.6)                 |                    |

†Post hoc α was Bonferroni corrected to 0.017. Only significant post hoc Fisher’s exact test P values shown.

Rows may not add up to exactly 100% due to rounding.

Supplementary Table 2. Presence of visual acuity and presence of a sign/symptom or diagnosis based on referral format.

| Referral Format, n (%)      | Presence of Visual Acuity |            |                                | Presence of a Sign/Symptom or Diagnosis |           |                                |
|-----------------------------|---------------------------|------------|--------------------------------|-----------------------------------------|-----------|--------------------------------|
|                             | Present                   | Absent     | Post hoc Analysis <sup>†</sup> | Present                                 | Absent    | Post hoc Analysis <sup>†</sup> |
| a. Computer-generated       | 239 (35.9)                | 427 (64.1) | a. vs b.<br>P < 0.001          | 588 (88.3)                              | 78 (11.7) | a. vs c.<br>P < 0.001          |
| b. Handwritten              | 43 (57.3)                 | 32 (42.7)  | a. vs c.<br>P < 0.001          | 72 (96.0)                               | 3 (4.0)   |                                |
| c. POWH Eye Clinic Template | 174 (84.9)                | 31 (15.1)  | b. vs c.<br>P < 0.001          | 201 (98.0)                              | 4 (2.0)   |                                |

<sup>†</sup>Post hoc  $\alpha$  was Bonferroni corrected to 0.017. Only significant post hoc Fisher's exact test P values shown.

Supplementary Table 3. Triage decision of referrals based on the visual acuity provided.

| Triage Decision, n (%)     | Better than 6/12 | 6/12 to better than 6/60 | Worse than 6/60 | Not Reported |
|----------------------------|------------------|--------------------------|-----------------|--------------|
| Within 1 month             | 24 (30.0)        | 5 (6.3)                  | 5 (6.3)         | 46 (57.5)    |
| 3-6 months                 | 17 (24.3)        | 22 (31.4)                | 9 (12.9)        | 22 (31.4)    |
| 6-12 months                | 0 (0.0)          | 2 (50.0)                 | 0 (0.0)         | 2 (50.0)     |
| General Clinic non-urgent  | 22 (17.5)        | 17 (13.5)                | 5 (2.4)         | 84 (66.7)    |
| Cataract Clinic non-urgent | 28 (16.2)        | 79 (45.7)                | 5 (2.9)         | 61 (35.3)    |
| Specific Doctor's Clinic   | 14 (20.9)        | 8 (11.9)                 | 4 (6.0)         | 41 (61.2)    |
| Rejected                   | 0 (0.0)          | 1 (12.5)                 | 0 (0.0)         | 7 (87.5)     |

Rows may not add up to exactly 100% due to rounding.
